# Supplementary material for: The New, Confusing CPT Codes: Tips for Documenting and Billing to Get Paid What You Deserve
Source: Atypon-hosted journal article supplement (doi:10.1176/appi.ps.201400321), 2015-02-17
Supplement: appi.ps.201400321.ds001.pdf [file appi.ps.201400321.ds001.pdf]

Table 1: Scoring of Outpatient Follow Up E/M Encounters Based on Complexity of the Components.

| Component                   | Problem Focused | Expanded Problem Focused | Detailed       | Comprehensive  |
|-----------------------------|-----------------|--------------------------|----------------|----------------|
| History                     | Problem Focused | Expanded Problem Focused | Detailed       | Comprehensive  |
| Examination                 | Problem Focused | Expanded Problem Focused | Detailed       | Comprehensive  |
| Medical Decision Complexity | Straightforward | Low                      | Moderate       | High           |
| Code (Average Time)         | 99212 (10 min)  | 99213 (15 min)           | 99214 (25 min) | 99215 (40 min) |

Table 2: CMS 2014 National Payment Amount<sup>5</sup>

| CPT Code    | Non-Facility \$ | Facility \$   |
|-------------|-----------------|---------------|
| 90792       | 144.37          | 140.07        |
| 99201-99205 | 43.35-207.06    | 26.51-170.16  |
| 99221-99223 | 102.09-204.19   | 102.09-204.19 |

Table 3: Times for Commonly Used E/M Codes

| New Patients        | Established Patients |
|---------------------|----------------------|
| 99201<br>10 minutes | 99211<br>5 minutes   |
| 99202<br>20 minutes | 99212<br>10 minutes  |
| 99203<br>30 minutes | 99213<br>15 minutes  |
| 99204<br>45 minutes | 99214<br>25 minutes  |
| 99205<br>60 minutes | 99215<br>40 minutes  |
